# Supplementary material for: Genome-Wide Association Studies of Biluochun Tea Plant Populations in Dongting Mountain and Comprehensive Identification of Candidate Genes Associated with Core Agronomic Traits by Four Analysis Models
Source: Plants (Basel). 2023 Oct 30;12(21):3719. doi: 10.3390/plants12213719 (PMC10650078; doi:10.3390/plants12213719)
Supplement: Supplementary file 1 [file plants-12-03719-s001.zip]

Archive with 7 entries (7 files):
- Supplement figures.pdf
- Table S1.xlsx
- Table S2.xlsx
- Table S3.xlsx
- Table S4.xlsx
- Table S5.xlsx
- Tbale S6.xlsx
