# Supplementary material for: Genome-Wide Association Studies of Biluochun Tea Plant Populations in Dongting Mountain and Comprehensive Identification of Candidate Genes Associated with Core Agronomic Traits by Four Analysis Models
Source: Plants (Basel). 2023 Oct 30;12(21):3719. doi: 10.3390/plants12213719 (PMC10650078; doi:10.3390/plants12213719)
Supplement: Supplementary file 1 [file plants-12-03719-s001.zip › Table S1.xlsx]

## Sheet: Sheet1
Table S1. Statistical analysis of 18 agronomic traits.
Traits	Mean	Min	Max	Range	Std.deviation	Coefficient of variation (%)	Shannon-Weiner index
Leaf Length/cm	37.2735	23.1673	54.6863	31.5189	5.88625	0.15897	6.22989
Leaf Width/cm	16.3509	11.7696	21.4412	9.67159	2.15094	0.132423	6.23531
Leaf area/cm^2	434.056	200.552	878.106	677.554	127.945	0.296724	6.1872
Tea polyphenols/% *	13.1393	8.75	22.3438	13.5938	3.00422	0.229884	6.50379
Soluble Sugar/% *	4.52649	1.98562	6.10654	4.12092	1.05448	0.234221	6.49624
Free Amino Acid/% *	2.91418	1.1492	6.84589	5.69669	1.27751	0.440753	6.40996
Chlorophylls/%	0.489679	0.283024	0.856357	0.573333	0.112881	0.232116	6.15285
GA/% *	0.211726	0.131886	0.674872	0.542985	0.00109582	0.520369	6.38975
GC/% *	1.2155	0.984585	2.2737	1.28912	0.0020975	0.173498	6.5202
EGC/% *	3.33542	1.38426	5.05051	3.66624	0.00937216	0.282512	6.47827
C/% *	0.94975	0.86516	1.04459	0.179435	0.00039192	0.0414892	6.53793
CAF/% *	3.13218	1.65195	7.09291	5.44096	0.0137925	0.442735	6.41759
EC/% *	1.73419	1.06668	2.49834	1.43165	0.0034043	0.197369	6.51113
EGCG/% *	5.09492	4.01805	8.81929	4.80124	0.0116465	0.229829	6.50535
GCG/% *	2.84024	2.48866	3.38785	1.83989	0.00259856	0.0919865	6.53346
ECG/% *	4.66557	4.02686	5.10942	1.08256	0.00469497	0.101176	6.53175
CG/% *	2.7389	2.30213	4.71472	2.41258	0.00556148	0.204156	6.51271
Total Catechins/% *	22.7862	17.6507	30.0139	12.3632	0.0249424	0.110056	6.53077
* represents that this substance accounts for the quality of dry leaves. Chlorophylls account for the quality of fresh leaves
