# Supplementary material for: Genome-Wide Association Studies of Biluochun Tea Plant Populations in Dongting Mountain and Comprehensive Identification of Candidate Genes Associated with Core Agronomic Traits by Four Analysis Models
Source: Plants (Basel). 2023 Oct 30;12(21):3719. doi: 10.3390/plants12213719 (PMC10650078; doi:10.3390/plants12213719)
Supplement: Supplementary file 1 [file plants-12-03719-s001.zip › Table S2.xlsx]

## Sheet: Sheet1
Table S2. Tea plants whole genome resequencing data output statistics.
Sample	Data Number	Raw Base (G)	Clean Reads (bp)	Raw Base (G)	Q20 (%)	Q30 (%)	GC (%)	Clean/Raw (%)	Map reads rate (%)	Sequence Depth (X)	Coverage Rate (%)
BLL-10	182756668	27.41	180088058	26.72	95.62	89.15	38.61	98.54	97.47	9.11	89.44
BLL-11	196024302	29.4	194662008	28.95	96.44	90.78	41.27	99.31	97.9	9.87	87.63
BLL-12	236578018	35.49	229928498	34.21	96.9	91.85	36.53	97.19	97.44	11.66	86.73
BLL-13	223977402	33.6	220722740	32.78	96.14	90.17	38.79	98.55	97.6	11.17	89.1
BLL-17	198728968	29.81	195430682	29.07	97.05	92.16	37.88	98.34	96.82	9.91	90.56
BLL-21	196852298	29.53	193906216	28.82	96.88	91.88	38.47	98.5	97.68	9.83	90.97
BLL-22	213090340	31.96	210670000	31.35	97.37	92.86	38.19	98.86	97.44	10.69	89.83
BLL-5	186157056	27.92	183821434	27.3	96.78	91.45	38.85	98.75	97.5	9.31	88.8
BLL-7	185023160	27.75	180958390	26.89	96.25	90.42	35.61	97.8	96.33	9.17	85.17
BLX-13	205106228	30.77	202143176	30.01	97.04	92.21	38.9	98.56	97.68	10.23	90.44
BLX-15	242950540	36.44	239678042	35.64	97.43	93.03	38.17	98.65	96.93	12.15	91.27
BLX-19	204995532	30.75	202429398	30.08	97.07	92.27	38.96	98.75	97.76	10.26	88.95
BLX-27	208141386	31.22	203656126	30.31	96.19	90.16	36.72	97.85	97.64	10.34	90.65
BLX-28	208787824	31.32	204838892	30.48	97.13	92.35	37.28	98.11	97.41	10.39	90.22
BLX-30	185250392	27.79	183259778	27.13	97.11	92.28	40.63	98.93	97.86	9.25	89.71
BLX-9	191665624	28.75	188689270	28.06	97.08	92.28	38.02	98.45	97.91	9.57	91.64
BW-1	178692038	26.8	176668828	26.07	95.88	89.87	41.91	98.87	97.81	8.89	84.86
BW-2	188451902	28.27	185934054	27.37	95.7	89.56	42.07	98.66	97.88	9.33	85.09
MLS-1	190220570	28.53	188903662	28.09	96.78	91.57	41.44	99.31	98.22	9.58	87.26
MLS-10	188889780	28.33	187660428	27.91	96.84	91.7	41.36	99.35	98.32	9.52	89.01
MLS-101	194591562	29.19	193203126	28.71	96.81	91.65	41.02	99.29	98.17	9.79	87.54
MLS-102	193473332	29.02	191070182	28.39	97.03	92.19	38.82	98.76	97.54	9.68	91.5
MLS-104	180620920	27.09	179253446	26.68	96.35	90.62	41.14	99.24	98.01	9.1	90.19
MLS-105	216950424	32.54	215370682	32.02	96.78	91.58	41.27	99.27	98.24	10.92	90.1
MLS-108	193010022	28.95	191476798	28.48	96.17	90.28	41.09	99.21	97.7	9.71	90.51
MLS-109	191302562	28.7	189876190	28.22	96.69	91.39	41.52	99.25	98.41	9.62	88.6
MLS-110	215931820	32.39	214085278	31.79	96.49	91.03	41.64	99.14	97.85	10.84	88.06
MLS-111	218137124	32.72	215707350	32.06	97.4	92.97	39.16	98.89	97.64	10.93	90.7
MLS-113	191538224	28.73	190154888	28.3	96.33	90.57	41.06	99.28	98.01	9.65	89.82
MLS-114	191271862	28.69	189917626	28.25	96.7	91.39	41.36	99.29	98.25	9.63	88.44
MLS-115	198943322	29.84	197313168	29.36	96	89.93	41	99.18	97.95	10.01	90.28
MLS-13	202664992	30.4	200325644	29.72	97.01	92.19	39.8	98.85	97.04	10.13	90.58
MLS-16	181171780	27.18	178938312	26.56	97.11	92.39	39.96	98.77	97.52	9.06	87.51
MLS-17	204046688	30.61	202542142	30.12	96.99	92	41.5	99.26	98.27	10.27	89.82
MLS-18	183600496	27.54	182209562	27.09	96.74	91.49	41.34	99.24	98.16	9.24	87.06
MLS-19	194993712	29.25	192118062	28.55	97.09	92.28	38.44	98.53	97.72	9.73	89.9
MLS-2	274448062	41.17	271972178	40.4	96.36	90.43	41.07	99.1	98.02	13.78	80.46
MLS-21	198498274	29.77	197076424	29.31	96.86	91.7	41.22	99.28	98.1	9.99	89.11
MLS-22	345957940	51.89	340535712	50.67	97.39	92.95	37.86	98.43	97.59	17.28	90.28
MLS-24	209888588	31.48	208201648	30.95	96.61	91.23	41.38	99.2	97.93	10.55	87.95
MLS-25	263582128	39.54	261746318	38.95	96.55	90.91	41.1	99.3	92.91	13.28	92.05
MLS-26	191558092	28.73	188811004	28.04	97.15	92.45	38.92	98.57	97.74	9.56	91.82
MLS-27	200135210	30.02	198666192	29.52	96.65	91.29	41.42	99.27	98.16	10.07	88.45
MLS-28	243751398	36.56	240994140	35.84	97.23	92.58	38.87	98.87	97.8	12.22	92.62
MLS-3	196350116	29.45	194709888	28.92	96.62	91.26	41.57	99.16	98.32	9.86	89.94
MLS-33	187028630	28.05	185746634	27.64	96.89	91.8	41.19	99.31	97.97	9.42	90.53
MLS-37	215055286	32.26	212064980	31.52	97.13	92.41	38.54	98.61	97.36	10.75	89.97
MLS-39	198711028	29.81	197356446	29.36	96.85	91.71	41.22	99.32	98.24	10.01	89.91
MLS-40	230551616	34.58	228825614	34.06	96.2	90.31	41.02	99.25	97.8	11.61	88.69
MLS-43	194510374	29.18	193030622	28.71	96.44	90.77	40.84	99.24	97.96	9.79	90.54
MLS-5	204751452	30.71	203213794	30.19	96.59	91.2	41.68	99.25	98.2	10.29	88.6
MLS-52	196117276	29.42	193174288	28.73	97.1	92.37	38.17	98.5	97.09	9.8	91.24
MLS-53	194267736	29.14	192671608	28.67	96.23	90.42	41.12	99.18	97.89	9.77	89.76
MLS-54	186831182	28.02	185440140	27.57	96.73	91.48	41.22	99.26	98.31	9.4	87.16
MLS-55	196197880	29.43	194708278	28.94	96.58	91.14	41.32	99.24	98.16	9.87	90.91
MLS-56	191494876	28.72	190019834	28.25	96.56	91.12	41.06	99.23	92.51	9.63	89.24
MLS-59	199784804	29.97	197182310	29.3	97.26	92.65	38.81	98.7	97.22	9.99	87.72
MLS-60	229671228	34.45	228068422	33.93	96.53	90.97	41.3	99.3	97.88	11.57	90.99
MLS-61	278731376	41.81	276605816	41.13	96.28	90.22	41.12	99.24	98.08	14.02	91.84
MLS-62	203018230	30.45	201541548	30.02	96.31	90.5	40.72	99.27	98.02	10.24	89.48
MLS-64	208928748	31.34	207453468	30.88	96.85	91.7	40.34	99.29	97.44	10.53	92.35
MLS-66	308802730	46.32	306406540	45.55	96.87	91.44	41.11	99.22	98.21	15.53	91.4
MLS-67	221745176	33.26	217561556	32.36	97.09	92.22	37.1	98.11	97.64	11.03	88.06
MLS-68	223684346	33.55	221098292	32.87	97.16	92.47	39.14	98.84	97.61	11.21	91.89
MLS-69	188387594	28.26	187077052	27.81	96.73	91.5	41.48	99.3	98.18	9.48	89.4
MLS-7	192854896	28.93	191266934	28.4	96.52	91.04	41.25	99.18	98.07	9.68	88.63
MLS-70	195377724	29.31	193732050	28.78	96.79	91.67	41.75	99.16	97.92	9.81	86.73
MLS-73	224331542	33.65	222693170	33.12	96.77	91.54	41.5	99.27	98.22	11.29	90.74
MLS-77	204040612	30.61	202720638	30.15	96.93	91.89	41.3	99.35	98.14	10.28	87.49
MLS-84	200287548	30.04	196636292	29.23	97.12	92.38	37.97	98.18	97.78	9.97	88.23
MLS-85	188002488	28.2	186663696	27.76	96.65	91.26	41.36	99.29	98.34	9.46	89.18
MLS-87	194204604	29.13	191709874	28.46	97.11	92.4	39.34	98.72	97.54	9.7	91.67
MLS-88	192550024	28.88	191185614	28.42	96.74	91.49	41.17	99.29	98.31	9.69	89.68
MLS-9	204247776	30.64	202499590	30.13	96.18	90.28	41.26	99.14	97.91	10.27	91.02
MLS-93	220437872	33.07	218822670	32.53	96.43	90.77	41.2	99.27	98.05	11.09	91.48
MLS-96	184228346	27.63	182885854	27.2	96.62	91.25	41.34	99.27	98.11	9.27	91.11
MLS-98	196157752	29.42	192192774	28.6	96.99	92.05	36.52	97.98	97.6	9.75	87.54
MLS-99	206897012	31.03	205336942	30.53	96.61	91.25	41.4	99.25	98.26	10.41	89.67
SJ-1	182207564	27.33	180229416	26.67	94.95	87.84	40.82	98.91	97.72	9.09	88.71
SJ-2	187234662	28.09	184497224	27.15	95.22	88.45	41.83	98.54	97.54	9.26	86.78
SJ-3	186229436	27.93	183634454	27.07	94.6	87.28	41.2	98.61	97.45	9.23	87.01
SJ-4	185964956	27.89	183383838	27.04	95.18	88.37	42.56	98.61	96.8	9.22	84.62
SJ-5	183709042	27.56	181540960	26.83	95.02	87.97	41.75	98.82	97.09	9.15	85.88
SJ-6	189216612	28.38	187008632	27.62	95.27	88.46	42.11	98.83	96.56	9.42	86.8
SJ-7	190347238	28.55	188003478	27.74	96.71	91.48	42.2	98.77	97.88	9.46	85.48
SJ-8	187387394	28.11	185157722	27.31	96.72	91.51	41.99	98.81	97.82	9.31	85.63
ZW-1	189031864	28.35	186988442	27.66	96.03	90.1	40.58	98.92	97.7	9.43	90.44
ZW-2	201536340	30.23	198555254	29.22	95.65	89.46	42.5	98.52	96.35	9.96	85.57
ZW-3	184257704	27.64	182289600	26.95	95.86	89.78	41.16	98.93	97.93	9.19	86.36
ZW-4	185009622	27.75	182918262	27.02	95.76	89.59	41.24	98.87	97.21	9.21	86.24
ZW-5	176780356	26.52	174982706	25.85	96.47	90.98	41.42	98.98	97.92	8.81	85.43
ZW-6	191063368	28.66	188534496	27.79	95.56	89.27	41.72	98.68	97.04	9.48	86.09
ZW-7	182206108	27.33	180147528	26.58	96.12	90.33	41.61	98.87	97.82	9.06	88.2
ZW-8	192901912	28.94	190621426	28.11	95.88	89.86	41.46	98.82	97.55	9.58	86.49
ZW-9	186671946	28	184608090	27.27	95.91	89.9	41.56	98.89	97.7	9.3	86.03
