# Supplementary material for: Genome-Wide Association Studies of Biluochun Tea Plant Populations in Dongting Mountain and Comprehensive Identification of Candidate Genes Associated with Core Agronomic Traits by Four Analysis Models
Source: Plants (Basel). 2023 Oct 30;12(21):3719. doi: 10.3390/plants12213719 (PMC10650078; doi:10.3390/plants12213719)
Supplement: Supplementary file 1 [file plants-12-03719-s001.zip › Table S3.xlsx]

## Sheet: Sheet1
Table S3. The significant QTNs for five rice yield-related traits detected simultaneously by using two or more multi-locus GWAS methods.
Tarit	SNP	Chr	Position	p-value	R2	Method	Genes
Soluble sugar	qSS-1-1	1	57668206	1.97x10-10	0.32	1,2	--
	qSS-3-1	3	76025925	2.26x10-9	0.3	1,2	CSS0039492;CSS0026216
	qSS-9-1	9	163975840	2.28x10-9	0.35	1,2	CSS0016203;CSS0044188
Free amino acid	qFA-1-1	1	190248682	1.66x10-9	0.57	1,3,4	--
	qFA-2-1	2	209769133	8.87x10-10	0.45	1,4	CSS0040558;CSS0005199
	qFA-2-2	2	46306500	3.50x10-9	0.45	1,3,4	CSS0005175
	qFA-3-1	3	182814110	3.78x10-9	0.28	2,3,4	CSS0033995;CSS0003779
	qFA-3-2	3	72254841	2.95x10-9	0.35	3,4	--
Total polyphenols	qTP-1-1	1	55984559	1.93x10-11	0.35	1,2	CSS0029534;CSS0010849
	qTP-1-2	1	102563575	4.88x10-11	0.36	1,2	--
	qTP-2-1	2	180137510	2.64x10-11	0.32	1,2	--
	qTP-3-1	3	135438028	4.31x10-11	0.31	1,2	CSS0005411;CSS0040236;CSS0000702;CSS0049505
	qTP-3-2	3	135419088	2.96x10-9	0.3	1,2	CSS0040236
	qTP-6-1	6	62758415	5.27x10-10	0.45	1,2	--
	qTP-6-2	6	62758431	4.90x10-10	0.44	1,2	--
	qTP-6-3	6	62767485	2.50x10-10	0.38	1,2	--
	qTP-9-1	9	149077806	1.31x10-11	0.35	1,2	CSS0016642;CSS0013019;CSS0003212
	qTP-9-2	9	149032509	3.64x10-11	0.24	1,2	CSS0016642
	qTP-9-3	9	149033334	4.16x10-11	0.24	1,2	CSS0016642
	qTP-9-4	9	163975840	7.27x10-11	0.44	1,2	CSS0016203;CSS0044188
	qTP-11-1	11	19556925	7.50x10-10	0.42	1,2	--
	qTP-12-1	12	78171859	7.00x10-13	0.35	1,2	--
	qTP-12-2	12	78171879	1.53x10-13	0.31	1,2	--
	qTP-12-3	12	78171889	1.29x10-13	0.34	1,2	--
	qTP-12-4	12	78173333	7.24x10-12	0.34	1,2	--
	qTP-12-5	12	78181522	3.99x10-12	0.35	1,2	--
	qTP-12-6	12	78184126	5.19x10-10	0.29	1,2	--
	qTP-12-7	12	78196505	1.77x10-16	0.48	1,2	--
	qTP-12-8	12	79084678	6.92x10-11	0.3	1,2	--
	qTP-14-1	14	26211237	1.33x10-11	1.11	1,2	CSS0032557
	qTP-14-2	14	83784706	1.47x10-10	0.38	1,2	CSS0024069
Total catechins	qTC-1-1	1	55984559	5.87x10-11	0.34	1,2	CSS0029534;CSS0010849
	qTC-3-1	3	59250629	2.05x10-9	0.27	1,2	CSS0002607
	qTC-3-2	3	121171260	2.99x10-10	0.32	1,2	--
	qTC-3-3	3	135399308	6.64x10-11	0.33	1,2	CSS0005411
	qTC-3-4	3	135403755	2.88x10-9	0.28	1,2	CSS0005411
	qTC-3-5	3	135438028	2.71x10-9	0.26	1,2	CSS0005411;CSS0040236;CSS0000702;CSS0049505
	qTC-5-1	5	38770620	5.56x10-10	0.34	1,2	CSS0007002
	qTC-9-1	9	140324479	6.44x10-10	0.27	1,2	CSS0004678
	qTC-9-2	9	140324487	1.47x10-9	0.29	1,2	CSS0004678
	qTC-12-1	12	78171879	9.45x10-10	0.25	1,2	--
	qTC-12-2	12	78171889	1.02x10-9	0.27	1,2	--
	qTC-12-3	12	78175125	4.85x10-10	0.29	1,2	--
	qTC-12-4	12	78181522	2.25x10-10	0.35	1,2	--
	qTC-12-5	12	78196505	1.76x10-9	0.33	1,2	--
Caffeine	qCAF-1-1	1	27622867	1.51x10-9	0.29	1,2	--
	qCAF-3-1	3	78792036	6.67x10-10	0.41	1,2	CSS0004188
	qCAF-3-2	3	184888971	4.36x10-10	0.26	1,2	--
	qCAF-5-1	5	37149758	1.69x10-9	0.38	1,2	--
	qCAF-5-2	5	190087382	2.73x10-9	0.25	1,2	--
	qCAF-6-1	6	83867805	8.13x10-10	0.35	1,2	CSS0019565;CSS0048738
	qCAF-7-1	7	54256950	6.92x10-10	0.32	1,2	CSS0035927;CSS0031688;CSS0042951
	qCAF-9-1	9	86512062	2.32x10-9	0.41	1,2	CSS0021430
	qCAF-9-2	9	86515266	3.28x10-9	0.23	1,2	CSS0021430
	qCAF-9-3	9	86517811	3.37x10-9	0.35	1,2	CSS0021430
	qCAF-9-4	9	86521766	5.99x10-10	0.28	1,2	CSS0021430
	qCAF-9-5	9	141418417	2.38x10-9	0.29	1,2	CSS0039426;CSS0015335;CSS0046824;CSS0016695
	qCAF-9-6	9	163924725	2.10x10-10	0.38	1,2	CSS0016203
	qCAF-9-7	9	163975840	6.08x10-10	0.38	1,2	CSS0016203;CSS0044188
	qCAF-11-1	11	19556925	2.82x10-9	0.26	1,2	--
	qCAF-12-1	12	77926230	1.99x10-9	0.26	1,2	CSS0046015;CSS0010868
	qCAF-12-2	12	78171859	3.48x10-14	0.42	1,2	--
	qCAF-12-3	12	78171879	1.15x10-13	0.33	1,2	--
	qCAF-12-4	12	78171889	5.10x10-14	0.36	1,2	--
	qCAF-12-5	12	78174188	2.51x10-9	0.28	1,2	--
	qCAF-12-6	12	78181522	2.36x10-11	0.35	1,2	--
	qCAF-12-7	12	78196505	1.26x10-9	0.33	1,2	--
	qCAF-12-8	12	78861224	2.23x10-9	0.27	1,2	--
	qCAF-12-9	12	79084678	8.96x10-11	0.28	1,2	--
	qCAF-12-10	12	79084683	1.60x10-9	0.26	1,2	--
	qCAF-12-11	12	79105749	3.69x10-9	0.33	1,2	--
	qCAF-12-12	12	79149788	3.15x10-9	0.29	1,2	--
	qCAF-12-13	12	79163133	7.19x10-10	0.49	1,2	--
	qCAF-12-14	12	79196797	4.98x10-10	0.42	1,2	--
	qCAF-12-15	12	132282176	7.06x10-12	0.31	1,2	--
	qCAF-12-16	12	133363818	9.43x10-10	0.25	1,2	CSS0045545
	qCAF-14-1	14	83784706	2.76x10-9	0.29	1,2	CSS0024069
	qCAF-15-1	15	115553306	2.82x10-9	0.33	1,2	CSS0005048
GC	qGC-1-1	1	12090057	2.49x10-9	0.29	3,4	CSS0024163;CSS0047366;CSS0032039
	qGC-1-2	1	27660211	2.82x10-10	0.39	1,2,3,4	--
	qGC-1-3	1	34265098	1.77x10-10	0.5	1,3,4	CSS0011130;CSS0031694
	qGC-1-4	1	45799774	2.82x10-9	0.31	1,3,4	CSS0002812
	qGC-1-5	1	80588174	3.35x10-10	0.42	1,2	CSS0042178;CSS0049041;CSS0025955
	qGC-1-6	1	88787446	6.93x10-11	0.26	1,2,3,4	--
	qGC-1-7	1	101471801	9.45x10-12	0.39	1,2,3,4	CSS0019471
	qGC-1-8	1	104079005	1.10x10-9	0.28	1,3,4	--
	qGC-1-9	1	130152556	6.49x10-10	0.42	1,2	--
	qGC-1-10	1	168041489	4.90x10-10	0.33	1,2	CSS0013050;CSS0024607;CSS0042264;CSS0049443;CSS0003873;CSS0027119
	qGC-1-11	1	186734465	2.09x10-10	0.26	1,2,3,4	CSS0023916;CSS0032370;CSS0019871
	qGC-1-12	1	186734487	9.57x10-10	0.31	3,4	CSS0023916;CSS0032370;CSS0019871
	qGC-1-13	1	190132497	5.15x10-11	0.3	1,2	CSS0040471;CSS0024793;CSS0025078;CSS0045917
	qGC-10-1	10	13374908	3.48x10-11	0.3	1,2	CSS0027897;CSS0025545;CSS0043372
	qGC-10-2	10	69139068	1.57x10-10	0.34	1,2,3,4	CSS0050399;CSS0029585;CSS0019601
	qGC-10-3	10	97661994	9.17x10-10	0.32	3,4	CSS0010158
	qGC-10-4	10	102502705	1.01x10-9	0.38	1,2	CSS0008251
	qGC-10-5	10	101900457	5.96x10-10	0.4	1,2	CSS0011537;CSS0037433
	qGC-10-6	10	118769511	2.23x10-9	0.38	1,2	CSS0038078;CSS0007396;CSS0008896;CSS0002687
	qGC-10-7	10	129758056	6.95x10-10	0.33	1,2	CSS0038873;CSS0018834;CSS0040606;CSS0045828
	qGC-10-8	10	129758058	1.05x10-9	0.32	1,2	CSS0038873;CSS0018834;CSS0040606;CSS0045828
	qGC-10-9	10	136358132	1.39x10-9	0.27	1,2	--
	qGC-11-1	11	18885533	4.66x10-11	0.38	1,2,3,4	CSS0011968
	qGC-11-2	11	23446947	3.75x10-9	0.26	1,2	CSS0040604;CSS0020049
	qGC-11-3	11	25142800	1.57x10-10	0.23	1,2,3,4	CSS0039826
	qGC-11-4	11	57590190	5.72x10-10	0.69	1,2,3,4	CSS0017090;CSS0013187
	qGC-11-5	11	65211810	4.12x10-11	0.37	1,2	CSS0023322;CSS0023153;CSS0016326;CSS0027812
	qGC-11-6	11	66912977	4.69x10-10	0.33	1,2	CSS0045778;CSS0012436;CSS0038529;CSS0009640
	qGC-11-7	11	92316465	6.23x10-12	0.37	1,2,3,4	CSS0009657;CSS0003856
	qGC-11-8	11	101634888	2.37x10-9	0.35	3,4	CSS0037821
	qGC-12-1	12	46978621	1.33x10-9	0.38	3,4	CSS0026626
	qGC-12-2	12	47042060	4.63x10-10	0.36	1,2	CSS0040520
	qGC-12-3	12	63195907	1.49x10-9	0.35	1,3,4	--
	qGC-12-4	12	75128819	2.55x10-10	0.46	1,2,3,4	CSS0039687
	qGC-12-5	12	78167404	4.34x10-10	0.35	1,2	--
	qGC-12-6	12	78171889	3.42x10-10	0.28	1,2	--
	qGC-12-7	12	78181522	3.59x10-10	0.3	1,2	--
	qGC-12-8	12	78184448	5.52x10-11	0.29	1,2	--
	qGC-12-9	12	78192612	3.70x10-9	0.22	1,2	--
	qGC-12-10	12	78296729	5.55x10-10	0.29	1,2	CSS0029405;CSS0023829
	qGC-12-11	12	78298761	2.27x10-10	0.39	1,2	CSS0029405;CSS0023829
	qGC-12-12	12	78309620	1.25x10-10	0.32	1,2	CSS0029405;CSS0023829
	qGC-12-13	12	79068088	3.16x10-12	0.34	1,2	--
	qGC-12-14	12	79071240	6.54x10-11	0.4	1,2	--
	qGC-12-15	12	79092542	2.75x10-9	0.34	1,2	--
	qGC-12-16	12	79154941	1.97x10-9	0.29	1,2	--
	qGC-12-17	12	79154994	1.16x10-12	0.32	1,2	--
	qGC-12-18	12	79190709	6.68x10-10	0.29	1,2	--
	qGC-12-19	12	79858174	2.08x10-9	0.26	1,2	--
	qGC-12-20	12	84620691	9.70x10-10	0.32	3,4	CSS0029810
	qGC-12-21	12	93527410	1.85x10-9	0.31	1,2,3,4	--
	qGC-12-22	12	94350052	2.63x10-9	0.37	3,4	CSS0029493;CSS0033544;CSS0009160;CSS0021624
	qGC-12-23	12	132282176	2.45x10-9	0.29	1,2	--
	qGC-12-24	12	132310084	2.62x10-9	0.26	1,2	--
	qGC-12-25	12	148929638	1.15x10-10	0.35	3,4	CSS0019820;CSS0048429;CSS0005793;CSS0005270;CSS0012957
	qGC-12-26	12	158217003	3.62x10-9	0.3	1,2	CSS0048158;CSS0024989;CSS0032668;CSS0003604;CSS0033493
	qGC-12-27	12	158515906	1.63x10-10	0.42	1,2	CSS0049916
	qGC-12-28	12	158586943	2.39x10-9	0.3	1,2	CSS0049916;CSS0033204;CSS0033641
	qGC-12-29	12	159065381	2.21x10-9	0.31	1,2	CSS0007263;CSS0021680;CSS0012502;CSS0039348;CSS0006146
	qGC-12-30	12	159431973	2.73x10-9	0.31	1,2	CSS0007085;CSS0029239;CSS0036183;CSS0032200;CSS0004177
	qGC-12-31	12	159453149	3.85x10-10	0.33	1,2	CSS0007085;CSS0029239;CSS0036183;CSS0032200;CSS0004177
	qGC-12-32	12	159783794	2.96x10-10	0.35	1,2	CSS0026655
	qGC-12-33	12	159967057	3.23x10-12	0.38	1,2,3,4	CSS0048243;CSS0011855;CSS0001288;CSS0020159
	qGC-12-34	12	160311996	9.40x10-10	0.3	1,2	CSS0026206;CSS0043899
	qGC-12-35	12	160461462	2.69x10-9	0.42	1,3,4	CSS0017092;CSS0032549;CSS0013054
	qGC-12-36	12	160461474	2.69x10-9	0.42	1,3,4	CSS0017092;CSS0032549;CSS0013054
	qGC-13-1	13	12617308	7.32x10-10	0.37	1,2,3,4	CSS0001073;CSS0001516;CSS0015215
	qGC-13-2	13	12617311	1.29x10-9	0.31	3,4	CSS0001073;CSS0001516;CSS0015215
	qGC-13-3	13	57398009	4.21x10-10	0.37	1,2,3,4	CSS0004989;CSS0007155
	qGC-13-4	13	83920713	5.83x10-10	0.45	1,2	--
	qGC-13-5	13	113807227	6.29x10-10	0.44	1,2,3,4	CSS0022623;CSS0042557;CSS0008993
	qGC-13-6	13	108370796	1.16x10-9	0.28	3,4	CSS0033989;CSS0036585;CSS0037645;CSS0017765
	qGC-14-1	14	34080036	1.43x10-11	0.27	1,2,3,4	CSS0001415;CSS0046827;CSS0015429;CSS0027974;CSS0014122;CSS0045371;CSS0046614
	qGC-14-2	14	74777998	7.28x10-10	0.29	3,4	--
	qGC-14-3	14	95149824	2.60x10-9	0.42	1,2	CSS0045576
	qGC-15-1	15	2032840	3.50x10-11	0.37	1,2,3,4	--
	qGC-2-1	2	2802929	9.16x10-11	0.31	3,4	CSS0041226;CSS0009369;CSS0026574;CSS0013993;CSS0018545;CSS0017064;CSS0036607
	qGC-2-2	2	2819244	2.96x10-9	0.24	3,4	CSS0017064
	qGC-2-3	2	20923433	5.83x10-14	0.43	1,2,3,4	CSS0007774;CSS0034381;CSS0029696;CSS0040357
	qGC-2-4	2	22524639	1.41x10-10	0.4	1,2,3,4	CSS0026901;CSS0041455;CSS0039778
	qGC-2-5	2	36859820	4.49x10-10	0.3	1,2	CSS0018787
	qGC-2-6	2	36859824	5.55x10-10	0.3	1,2	CSS0018787
	qGC-2-7	2	36870837	1.76x10-9	0.24	1,2	CSS0018787
	qGC-2-8	2	38071587	2.96x10-9	0.24	1,2	CSS0031085;CSS0002330;CSS0030032
	qGC-2-9	2	72225724	8.49x10-10	0.28	1,3,4	CSS0016953;CSS0004263
	qGC-2-10	2	127290105	3.75x10-11	0.27	1,2	CSS0002183
	qGC-2-11	2	137437385	1.44x10-9	0.22	3,4	--
	qGC-2-12	2	137437391	7.87x10-10	0.24	3,4	--
	qGC-2-13	2	146287915	3.45x10-9	0.3	3,4	--
	qGC-2-14	2	154537585	7.09x10-10	0.36	1,2	CSS0039457
	qGC-3-1	3	20137710	1.89x10-9	0.37	1,2	CSS0020672;CSS0013486
	qGC-3-2	3	44496912	2.60x10-10	0.37	1,2,3,4	CSS0046505
	qGC-3-3	3	66114739	3.37x10-10	0.27	1,2	CSS0002265
	qGC-3-4	3	79192750	9.32x10-10	0.29	3,4	CSS0048486;CSS0030581
	qGC-3-5	3	120576195	1.38x10-10	0.34	1,2	CSS0023498;CSS0031116
	qGC-3-6	3	123958847	1.52x10-9	0.85	3,4	--
	qGC-3-7	3	150376475	8.01x10-10	0.41	1,2	CSS0043335;CSS0042032;CSS0045808
	qGC-3-8	3	167218879	1.01x10-10	0.46	1,2,3,4	CSS0026091;CSS0031850;CSS0003967;CSS0000636
	qGC-4-1	4	21627459	1.02x10-9	0.2	3,4	CSS0043229;CSS0036128
	qGC-4-2	4	27809949	1.63x10-9	0.26	1,2	CSS0002103;CSS0014228
	qGC-4-3	4	28336253	3.08x10-10	0.34	1,2	CSS0030378;CSS0022633;CSS0028344;CSS0050123;CSS0016503;CSS0004258
	qGC-4-4	4	37890511	1.12x10-9	0.34	1,2	CSS0023855;CSS0019505;CSS0036871
	qGC-4-5	4	65273876	3.14x10-9	0.28	1,2	CSS0035031;CSS0011792;CSS0036874;CSS0049616
	qGC-4-6	4	126954521	2.41x10-11	0.36	1,2	--
	qGC-4-7	4	133501226	5.54x10-10	0.32	1,2,3,4	CSS0036790;CSS0031730
	qGC-4-8	4	133829900	6.15x10-12	0.35	1,2,3,4	CSS0035602;CSS0028358
	qGC-4-9	4	171143495	3.29x10-9	0.31	1,2	CSS0018024;CSS0038970
	qGC-4-10	4	176769103	1.47x10-12	0.42	1,2,3,4	CSS0035160;CSS0028812
	qGC-4-11	4	176769130	5.73x10-11	0.35	1,2	CSS0035160;CSS0028812
	qGC-4-12	4	176929344	2.95x10-9	0.29	1,2	CSS0017232;CSS0007162;CSS0032660;CSS0050426;CSS0026008;CSS0035027;CSS0016372;CSS0044482
	qGC-5-1	5	14928842	6.70x10-13	0.4	1,2,3,4	CSS0044358;CSS0013475;CSS0045242;CSS0029268;CSS0019948
	qGC-5-2	5	26047690	2.00x10-9	0.23	3,4	CSS0018801;CSS0012104
	qGC-5-3	5	31262964	5.42x10-12	0.47	1,2,3,4	CSS0037683;CSS0023549
	qGC-5-4	5	31476902	7.66x10-10	0.24	1,3,4	--
	qGC-5-5	5	31542205	7.25x10-10	0.28	1,2,3,4	--
	qGC-5-6	5	31543570	7.43x10-10	0.31	1,2,3,4	--
	qGC-5-7	5	31543609	1.29x10-11	0.33	1,2,3,4	--
	qGC-5-8	5	31546938	2.96x10-9	0.33	3,4	--
	qGC-5-9	5	31550519	5.27x10-10	0.23	1,2,3,4	--
	qGC-5-10	5	31554452	1.63x10-9	0.25	1,2	--
	qGC-5-11	5	31554584	3.03x10-9	0.28	1,2	--
	qGC-5-12	5	31555311	3.69x10-10	0.29	1,2,3,4	--
	qGC-5-13	5	31561942	1.82x10-9	0.3	1,2	--
	qGC-5-14	5	31568768	2.99x10-10	0.28	1,2,3,4	CSS0006204;CSS0031139
	qGC-5-15	5	31710371	7.18x10-10	0.38	3,4	CSS0001355;CSS0032520;CSS0040074;CSS0000633;CSS0049408
	qGC-5-16	5	34043033	2.80x10-9	0.3	1,2	--
	qGC-5-17	5	36653300	2.84x10-10	0.26	1,2,3,4	CSS0040850;CSS0020164;CSS0012688
	qGC-5-18	5	36668833	3.41x10-10	0.29	1,2,3,4	CSS0020164;CSS0012688;CSS0002962
	qGC-5-19	5	36930028	1.71x10-10	0.29	1,2,3,4	--
	qGC-5-20	5	39493252	2.43x10-9	0.31	3,4	--
	qGC-5-21	5	80775259	1.03x10-9	0.28	1,3,4	CSS0019107;CSS0013458
	qGC-5-22	5	94072041	2.92x10-9	0.33	3,4	--
	qGC-5-23	5	122876999	2.00x10-9	0.31	1,2	CSS0024743;CSS0029653;CSS0048602;CSS0003518;CSS0029158;CSS0026344;CSS0040040
	qGC-5-24	5	123481928	1.40x10-9	0.3	1,2	--
	qGC-5-25	5	134677289	2.66x10-9	0.25	3,4	CSS0047181;CSS0046337;CSS0011202;CSS0016298
	qGC-5-26	5	143460888	6.91x10-10	0.43	1,2	CSS0018256;CSS0044095
	qGC-6-1	6	14248158	3.19x10-12	0.48	1,2,3,4	CSS0034144;CSS0016207;CSS0019961;CSS0026235
	qGC-6-2	6	18588011	3.95x10-10	0.28	1,2,3,4	--
	qGC-6-3	6	27748257	3.43x10-10	0.38	1,2,3,4	CSS0000306;CSS0012182
	qGC-6-4	6	40978204	3.56x10-9	0.28	1,3,4	CSS0032665
	qGC-6-5	6	63433108	1.30x10-12	0.43	1,2,3,4	CSS0042636;CSS0049054
	qGC-6-6	6	118014595	8.47x10-11	0.23	3,4	--
	qGC-6-7	6	119158785	2.58x10-9	0.43	3,4	CSS0050459
	qGC-6-8	6	119174708	1.18x10-9	0.27	3,4	--
	qGC-6-9	6	119174940	9.05x10-10	0.29	3,4	--
	qGC-6-10	6	119260676	3.53x10-9	0.4	3,4	--
	qGC-6-11	6	119388590	1.67x10-9	0.28	3,4	CSS0038323;CSS0022339;CSS0018447
	qGC-6-12	6	148785369	2.12x10-11	0.4	1,2,3,4	CSS0038562
	qGC-6-13	6	154988300	1.64x10-9	0.35	1,2	--
	qGC-7-1	7	17017649	1.89x10-9	0.32	1,2	CSS0025934;CSS0048908;CSS0030624;CSS0025308
	qGC-7-2	7	29157145	1.24x10-10	0.3	1,2	CSS0001384;CSS0019453;CSS0008941;CSS0022609;CSS0003194
	qGC-7-3	7	44661654	1.99x10-9	0.36	1,2,3,4	CSS0046917;CSS0020301;CSS0039058;CSS0032796
	qGC-7-4	7	97247905	5.79x10-10	0.34	1,2,3,4	--
	qGC-7-5	7	104850561	1.43x10-10	0.43	1,2,3,4	--
	qGC-7-6	7	141370420	4.25x10-10	0.55	3,4	CSS0017010;CSS0042989
	qGC-7-7	7	146422865	1.86x10-9	0.22	3,4	CSS0034982;CSS0033025
	qGC-7-8	7	173178557	2.10x10-10	0.27	1,2	CSS0046998;CSS0010184;CSS0024367;CSS0012674
	qGC-8-1	8	14646422	3.51x10-9	0.66	3,4	CSS0025357;CSS0000175;CSS0036990;CSS0006425
	qGC-8-2	8	26483347	3.97x10-10	0.31	1,3,4	CSS0040697;CSS0042849
	qGC-8-3	8	26584869	1.23x10-9	0.3	1,2	CSS0005927
	qGC-8-4	8	88600959	2.33x10-9	0.3	1,2	--
	qGC-8-5	8	154421571	7.52x10-13	0.36	1,2,3,4	CSS0039832;CSS0002402;CSS0011575
	qGC-8-6	8	155525161	2.61x10-9	0.23	3,4	CSS0009528;CSS0022819;CSS0025024;CSS0019726;CSS0030804;CSS0015856;CSS0032340;CSS0026463
	qGC-9-1	9	2664226	1.36x10-9	0.28	3,4	CSS0039168
	qGC-9-2	9	8301800	1.74x10-10	0.27	1,2,3,4	CSS0029069;CSS0010580;CSS0019087
	qGC-9-3	9	33137506	4.13x10-10	0.27	1,2	CSS0021817;CSS0003459;CSS0000956;CSS0000801
	qGC-9-4	9	41555648	3.38x10-9	0.3	1,2	CSS0034552
	qGC-9-5	9	74233206	3.10x10-10	0.32	1,2,3,4	CSS0014415;CSS0010188
	qGC-9-6	9	90681897	1.04x10-11	0.36	3,4	CSS0039479
	qGC-9-7	9	103189075	1.44x10-9	0.25	3,4	--
	qGC-9-8	9	108418454	2.31x10-9	0.33	1,2	CSS0032751;CSS0001554
	qGC-9-9	9	117773556	7.23x10-10	0.31	1,2	CSS0046530;CSS0022484;CSS0041332;CSS0005880
	qGC-9-10	9	120336845	2.32x10-10	0.29	1,2,3,4	CSS0003740
	qGC-9-11	9	139847263	5.44x10-10	0.61	3,4	--
	qGC-9-12	9	139995368	5.60x10-10	0.62	3,4	--
	qGC-9-13	9	140953905	3.39x10-9	0.24	1,2	--
	qGC-9-14	9	144566106	4.57x10-10	0.33	3,4	CSS0044862
	qGC-9-15	9	163883927	4.30x10-10	0.41	1,2	CSS0030174
GCG	qGCG-1-1	1	66256404	3.03x10-9	0.36	1,2	--
	qGCG-1-2	1	88787446	1.03x10-10	0.24	1,2,4	--
	qGCG-1-3	1	90026672	2.12x10-9	0.35	1,2	--
	qGCG-1-4	1	90277272	1.75x10-9	0.31	1,2	CSS0025829
	qGCG-1-5	1	90335699	9.11x10-10	0.39	1,2	--
	qGCG-1-6	1	93106994	2.62x10-9	0.43	1,2	CSS0048859
	qGCG-1-7	1	93799106	1.37x10-9	0.34	1,2	CSS0001149
	qGCG-1-8	1	104007870	3.07x10-9	0.33	1,2	--
	qGCG-1-9	1	123078297	7.70x10-12	0.54	1,2	CSS0025042;CSS0021721
	qGCG-1-10	1	123078432	4.11x10-10	0.37	1,2	CSS0025042;CSS0021721
	qGCG-1-11	1	148630295	6.37x10-10	0.31	1,2	CSS0041026
	qGCG-1-12	1	148633006	1.30x10-9	0.3	1,2	CSS0041026
	qGCG-1-13	1	160720795	7.23x10-12	0.3	1,2,3,4	CSS0040759
	qGCG-1-14	1	160728528	7.86x10-10	0.24	1,2,3,4	CSS0040759
	qGCG-1-15	1	160753753	1.14x10-10	0.3	1,2,3,4	--
	qGCG-1-16	1	162844458	3.85x10-10	0.24	1,2	CSS0006241;CSS0033438;CSS0025634
	qGCG-1-17	1	162844461	3.85x10-10	0.24	1,2	CSS0006241;CSS0033438;CSS0025634
	qGCG-1-18	1	162853597	1.77x10-9	0.2	1,2	CSS0006241;CSS0033438;CSS0025634
	qGCG-1-19	1	168041489	4.60x10-10	0.33	1,2	CSS0013050;CSS0024607;CSS0042264;CSS0049443;CSS0003873;CSS0027119
	qGCG-1-20	1	177753614	3.90x10-10	0.39	1,2	CSS0011225;CSS0006317
	qGCG-1-21	1	184038975	1.17x10-11	0.39	1,2,3,4	--
	qGCG-1-22	1	185180937	2.22x10-9	0.37	1,4	--
	qGCG-1-23	1	187530175	1.78x10-11	0.57	1,2,3,4	CSS0039286
	qGCG-1-24	1	188971488	8.40x10-10	0.3	1,2	CSS0046402;CSS0027939;CSS0034108;CSS0003765;CSS0020625
	qGCG-1-25	1	191525021	2.13x10-9	0.37	1,3,4	--
	qGCG-1-26	1	191744613	1.40x10-10	0.37	1,2,3,4	CSS0004077;CSS0033708;CSS0006422;CSS0008360
	qGCG-1-27	1	191948131	6.86x10-11	0.57	1,2,3,4	CSS0023497;CSS0049451;CSS0046754;CSS0021830
	qGCG-1-28	1	192250351	1.86x10-11	0.32	1,2	CSS0029800
	qGCG-1-29	1	192426966	1.08x10-10	0.36	1,2,3,4	CSS0045855;CSS0000575;CSS0031288
	qGCG-1-30	1	192577283	6.05x10-11	0.29	1,2,3,4	CSS0049924
	qGCG-1-31	1	197850559	2.35x10-11	0.39	1,2,3,4	CSS0019017;CSS0042829;CSS0022456
	qGCG-1-32	1	198999688	4.78x10-10	0.37	1,2,3,4	CSS0042124
	qGCG-1-33	1	199237683	1.39x10-10	0.36	1,2,3,4	CSS0011964
	qGCG-1-34	1	199258488	5.37x10-12	0.45	1,2,3,4	CSS0007696;CSS0045391
	qGCG-1-35	1	201243930	4.74x10-10	0.3	1,2,3,4	CSS0015221;CSS0043682;CSS0009881;CSS0030456
	qGCG-1-36	1	202610634	4.85x10-11	0.44	1,2,4	--
	qGCG-1-37	1	204140344	1.60x10-9	0.34	1,2	CSS0043484
	qGCG-10-1	10	36432512	2.21x10-9	0.37	1,2	CSS0010339
	qGCG-10-2	10	107274484	3.31x10-9	0.42	1,2	CSS0042595;CSS0024715;CSS0009770
	qGCG-10-3	10	109881031	2.25x10-9	0.33	3,4	CSS0045831
	qGCG-10-4	10	112204996	1.17x10-10	0.51	1,2,3,4	CSS0003540
	qGCG-10-5	10	166260172	1.65x10-11	0.45	1,2,3,4	--
	qGCG-11-1	11	13442640	1.96x10-14	0.55	1,2,3,4	CSS0024001;CSS0047584;CSS0029105
	qGCG-11-2	11	13498269	1.52x10-9	0.46	1,2	CSS0047584;CSS0029105;CSS0037514;CSS0044227
	qGCG-11-3	11	23035964	3.01x10-9	0.43	1,2	CSS0000959
	qGCG-11-4	11	94811803	4.58x10-10	0.31	1,2	CSS0024403;CSS0044556;CSS0008061
	qGCG-11-5	11	111693128	2.15x10-9	0.28	1,2	CSS0028218
	qGCG-12-1	12	55007308	1.06x10-9	0.33	1,2	--
	qGCG-12-2	12	76958033	3.96x10-10	0.4	3,4	CSS0021472;CSS0023023;CSS0044665;CSS0017226
	qGCG-12-3	12	84133465	3.58x10-9	0.24	3,4	--
	qGCG-12-4	12	97153100	2.35x10-9	0.27	1,2	CSS0035739
	qGCG-12-5	12	97688568	3.24x10-11	0.35	1,2	CSS0019323;CSS0023723
	qGCG-12-6	12	126652910	6.81x10-10	0.28	1,2	CSS0001412;CSS0042108
	qGCG-12-7	12	150453662	1.13x10-9	0.35	3,4	CSS0044655;CSS0014023
	qGCG-12-8	12	155327876	3.02x10-9	0.28	1,2	CSS0024186;CSS0031592;CSS0021276
	qGCG-13-1	13	19314180	3.22x10-9	0.52	3,4	CSS0032390;CSS0004190;CSS0022924;CSS0041412;CSS0034261;CSS0048563
	qGCG-13-2	13	20516548	3.32x10-10	0.39	1,2,3,4	CSS0004660;CSS0043283
	qGCG-13-3	13	28565214	1.35x10-11	0.35	1,2,3,4	CSS0042052
	qGCG-13-4	13	54045782	3.33x10-9	0.35	1,3,4	--
	qGCG-13-5	13	75071750	1.34x10-10	0.29	1,2,3,4	CSS0048088;CSS0013797
	qGCG-13-6	13	77913162	3.20x10-9	0.32	1,2	CSS0042330
	qGCG-13-7	13	78803230	2.14x10-9	0.26	1,2	CSS0041954;CSS0040343
	qGCG-13-8	13	84284210	2.65x10-9	0.44	3,4	--
	qGCG-13-9	13	102286343	7.67x10-10	0.26	1,2	CSS0002956;CSS0038241;CSS0023444;CSS0019493;CSS0007813;CSS0026692;CSS0028740;CSS0004847
	qGCG-13-10	13	125615192	2.84x10-9	0.47	1,2,3,4	CSS0037177
	qGCG-13-11	13	127926890	5.62x10-11	0.25	1,2,4	CSS0018807;CSS0020950;CSS0037914;CSS0007417
	qGCG-13-12	13	128404808	1.07x10-9	0.32	1,3,4	CSS0025182;CSS0047769;CSS0007097
	qGCG-13-13	13	130183355	3.26x10-9	0.34	1,3,4	--
	qGCG-13-14	13	130212790	2.03x10-9	0.46	3,4	CSS0032181
	qGCG-13-15	13	130884097	6.76x10-10	0.45	3,4	--
	qGCG-14-1	14	3306091	3.59x10-10	0.3	1,2,3,4	CSS0011201;CSS0038938;CSS0042236
	qGCG-14-2	14	19908171	2.21x10-9	0.3	3,4	--
	qGCG-14-3	14	39324696	1.67x10-10	0.72	1,2,3,4	--
	qGCG-14-4	14	67322119	1.38x10-9	0.51	1,2	CSS0011543
	qGCG-14-5	14	67565703	1.31x10-9	0.32	3,4	--
	qGCG-14-6	14	67603541	2.53x10-9	0.3	1,3,4	--
	qGCG-14-7	14	71540294	4.36x10-10	0.29	1,3,4	CSS0022242;CSS0004897;CSS0020965;CSS0010961;CSS0049907
	qGCG-14-8	14	84193068	1.66x10-9	0.38	1,2,3,4	--
	qGCG-14-9	14	85278351	3.04x10-9	0.33	3,4	CSS0034725;CSS0020504;CSS0002249
	qGCG-14-10	14	102343539	2.35x10-9	0.48	3,4	CSS0012666
	qGCG-14-11	14	122310070	2.91x10-9	0.37	1,3,4	--
	qGCG-14-12	14	122416052	3.80x10-9	0.26	3,4	--
	qGCG-15-1	15	17197889	1.31x10-10	0.31	1,2	CSS0032840
	qGCG-2-1	2	2235015	1.77x10-9	0.33	3,4	CSS0041561;CSS0035680;CSS0017070;CSS0000163
	qGCG-2-2	2	34455815	3.11x10-9	0.32	1,2	CSS0000619;CSS0031276;CSS0033945
	qGCG-2-3	2	34469940	1.91x10-9	0.33	1,2	CSS0031276;CSS0033945
	qGCG-2-4	2	106269855	3.84x10-9	0.27	1,2	--
	qGCG-2-5	2	107261010	5.94x10-11	0.33	1,2	CSS0031190;CSS0017805;CSS0008939;CSS0031063
	qGCG-2-6	2	107934866	2.97x10-9	0.26	1,2	CSS0015374;CSS0022367;CSS0042945
	qGCG-2-7	2	157698797	2.72x10-9	0.27	1,2	--
	qGCG-2-8	2	169414446	1.89x10-9	0.26	1,2	--
	qGCG-2-9	2	170317372	1.67x10-9	0.37	1,3,4	CSS0018235;CSS0035925;CSS0029060;CSS0027442
	qGCG-2-10	2	170677052	3.74x10-9	0.52	1,2	CSS0022233;CSS0004284;CSS0019972;CSS0034786
	qGCG-2-11	2	170825507	1.88x10-9	0.32	3,4	--
	qGCG-2-12	2	174377108	3.19x10-9	0.22	3,4	--
	qGCG-3-1	3	67914226	3.37x10-10	0.4	1,2	CSS0018071;CSS0033254;CSS0018394
	qGCG-3-2	3	78792036	2.79x10-10	0.52	1,2	CSS0004188
	qGCG-3-3	3	93450624	2.24x10-9	0.34	1,3,4	--
	qGCG-3-4	3	121148038	9.00x10-11	0.37	1,2	CSS0008005
	qGCG-3-5	3	121148255	2.71x10-10	0.29	1,2	CSS0008005
	qGCG-3-6	3	121151482	6.28x10-11	0.32	1,2	--
	qGCG-3-7	3	121152613	3.46x10-10	0.36	1,2	--
	qGCG-3-8	3	121152621	4.26x10-10	0.35	1,2	--
	qGCG-3-9	3	121154743	3.80x10-9	0.33	1,2	--
	qGCG-3-10	3	121162597	4.10x10-10	0.31	1,2	--
	qGCG-3-11	3	121171260	9.87x10-13	0.38	1,2	--
	qGCG-3-12	3	121177057	1.74x10-10	0.33	1,2	--
	qGCG-3-13	3	121235196	8.46x10-10	0.38	1,2	--
	qGCG-3-14	3	121236720	3.40x10-10	0.36	1,2	--
	qGCG-3-15	3	121256623	5.48x10-10	0.34	1,2	--
	qGCG-3-16	3	121268940	3.68x10-11	0.4	1,2	--
	qGCG-3-17	3	121283742	8.57x10-12	0.39	1,2	--
	qGCG-3-18	3	121386361	3.79x10-10	0.26	1,2	CSS0038121;CSS0036847
	qGCG-3-19	3	121697933	2.95x10-9	0.27	1,2	CSS0000543;CSS0050450
	qGCG-3-20	3	130574023	2.96x10-11	0.52	1,2,3,4	CSS0003115
	qGCG-3-21	3	152500564	1.35x10-10	0.34	1,2,3,4	CSS0013412
	qGCG-3-22	3	186812657	8.12x10-11	0.48	1,4	--
	qGCG-4-1	4	27322685	1.64x10-11	0.34	1,2,3,4	--
	qGCG-4-2	4	27322712	5.72x10-10	0.31	1,2,3,4	--
	qGCG-4-3	4	27718624	7.60x10-10	0.31	1,2	CSS0025532;CSS0013652;CSS0010703;CSS0027169
	qGCG-4-4	4	57502081	2.72x10-9	0.3	1,2	--
	qGCG-4-5	4	60564884	3.44x10-9	0.26	1,2	CSS0006563;CSS0003600
	qGCG-4-6	4	70550618	3.30x10-9	0.37	1,3,4	CSS0003378
	qGCG-4-7	4	71554802	2.37x10-9	0.21	3,4	--
	qGCG-4-8	4	76091987	2.47x10-10	0.37	1,2,3,4	CSS0013778;CSS0013595;CSS0002580
	qGCG-4-9	4	91225069	5.10x10-10	0.45	1,3,4	CSS0007966;CSS0047958;CSS0005180;CSS0018663
	qGCG-4-10	4	121764825	1.18x10-9	0.37	1,3,4	CSS0011431
	qGCG-4-11	4	143273070	1.80x10-9	0.23	1,2	CSS0009026
	qGCG-4-12	4	145814425	2.17x10-9	0.27	1,2	CSS0016328;CSS0023719;CSS0000036;CSS0029075;CSS0031256
	qGCG-5-1	5	14193164	1.93x10-9	0.26	1,3,4	CSS0037829;CSS0047944;CSS0032940
	qGCG-5-2	5	31543570	2.07x10-10	0.33	1,2	--
	qGCG-5-3	5	32331856	4.68x10-10	0.31	1,2,3,4	CSS0044376
	qGCG-5-4	5	34043033	1.38x10-10	0.33	1,2,3,4	--
	qGCG-5-5	5	34259936	3.56x10-9	0.38	3,4	CSS0011484
	qGCG-5-6	5	37071947	1.08x10-9	0.32	1,2	CSS0020403;CSS0019568;CSS0023061
	qGCG-5-7	5	45236646	1.89x10-9	0.32	1,2	CSS0003441;CSS0004903;CSS0022599
	qGCG-5-8	5	58847599	2.75x10-9	0.39	1,2,3,4	--
	qGCG-5-9	5	112128261	3.61x10-9	0.52	1,3,4	--
	qGCG-5-10	5	138429270	1.22x10-9	0.32	1,2	--
	qGCG-5-11	5	142611643	3.64x10-11	0.37	1,4	CSS0029764;CSS0016847;CSS0007881
	qGCG-5-12	5	148694290	1.75x10-9	0.38	3,4	--
	qGCG-6-1	6	77328097	6.19x10-10	0.34	1,2	--
	qGCG-6-2	6	78147585	6.01x10-11	0.33	1,2	CSS0046245;CSS0022031;CSS0029256
	qGCG-6-3	6	81369016	1.09x10-9	0.34	1,2,3,4	CSS0050524;CSS0021654;CSS0008434;CSS0022005
	qGCG-6-4	6	81369241	2.91x10-9	0.29	1,2	CSS0050524;CSS0021654;CSS0008434;CSS0022005
	qGCG-6-5	6	81731275	1.50x10-12	0.39	1,2,3,4	CSS0024185;CSS0024343;CSS0015050;CSS0041101;CSS0030430
	qGCG-6-6	6	81837885	1.67x10-10	0.36	1,4	CSS0041606
	qGCG-6-7	6	81837906	1.12x10-10	0.36	1,4	CSS0041606
	qGCG-6-8	6	81891593	2.41x10-10	0.25	1,2	CSS0041606;CSS0028174
	qGCG-6-9	6	82535217	1.06x10-10	0.36	1,2,3,4	CSS0019404;CSS0037798;CSS0029594;CSS0036786
	qGCG-6-10	6	83687894	2.51x10-9	0.36	1,2	CSS0040048;CSS0013339;CSS0020352;CSS0046846;CSS0000076
	qGCG-6-11	6	84776602	6.65x10-10	0.32	1,2	CSS0039187;CSS0006505;CSS0022618
	qGCG-6-12	6	84803210	1.21x10-10	0.27	1,2,3,4	CSS0022618;CSS0040148;CSS0042065
	qGCG-6-13	6	84847288	3.78x10-9	0.34	1,2	CSS0022618;CSS0040148;CSS0042065
	qGCG-6-14	6	85439300	2.28x10-10	0.3	1,2,3,4	CSS0012550;CSS0041346;CSS0033170
	qGCG-6-15	6	86002406	3.50x10-10	0.31	1,2,3,4	CSS0009973
	qGCG-6-16	6	88817843	2.17x10-10	0.37	1,2,3,4	--
	qGCG-6-17	6	97948701	1.74x10-9	0.33	1,2	CSS0025889
	qGCG-6-18	6	100963198	1.80x10-9	0.34	1,2	CSS0026244;CSS0022292;CSS0009895;CSS0023306;CSS0001854;CSS0038749
	qGCG-6-19	6	111563256	2.22x10-9	0.5	1,2	CSS0024992;CSS0031871;CSS0018990;CSS0041067
	qGCG-6-20	6	122467649	5.03x10-10	0.34	1,2	CSS0045870;CSS0034941
	qGCG-6-21	6	177116169	2.30x10-10	0.33	1,2	CSS0029020;CSS0019778
	qGCG-7-1	7	2191161	1.55x10-9	0.33	1,4	--
	qGCG-7-2	7	12351858	3.75x10-9	0.25	1,2	CSS0039282;CSS0025854;CSS0015412;CSS0034000;CSS0008016;CSS0006554
	qGCG-7-3	7	35366246	1.36x10-10	0.5	1,2,3,4	--
	qGCG-7-4	7	35366265	1.97x10-10	0.49	1,2,3,4	--
	qGCG-7-5	7	42865795	1.32x10-9	0.37	1,3,4	CSS0008274;CSS0032332
	qGCG-7-6	7	72866427	1.58x10-9	0.24	1,2	CSS0046808;CSS0031269;CSS0025216;CSS0007793
	qGCG-7-7	7	91005717	8.67x10-10	0.24	3,4	CSS0003520
	qGCG-7-8	7	97042493	1.01x10-10	0.48	1,2,4	--
	qGCG-7-9	7	168749784	6.08x10-11	0.42	1,2	CSS0037241;CSS0031340;CSS0008206;CSS0012818
	qGCG-7-10	7	181379764	1.20x10-9	0.33	1,2	CSS0047753;CSS0014747;CSS0006312;CSS0013051;CSS0024166
	qGCG-8-1	8	78560752	1.19x10-9	0.35	3,4	CSS0040842;CSS0015953
	qGCG-8-2	8	150488143	1.68x10-9	0.53	1,2	CSS0029468
	qGCG-9-1	9	19341778	1.93x10-9	0.25	3,4	CSS0031920;CSS0044229
	qGCG-9-2	9	54769653	3.79x10-9	0.27	1,2	CSS0038091;CSS0012859
	qGCG-9-3	9	65583170	1.43x10-9	0.32	1,2	--
	qGCG-9-4	9	65612401	1.71x10-9	0.35	1,2	--
	qGCG-9-5	9	66411467	1.20x10-12	0.33	1,2,3,4	--
	qGCG-9-6	9	67950852	2.91x10-9	0.22	3,4	CSS0014299;CSS0021414;CSS0024708;CSS0036844;CSS0031522;CSS0004681
	qGCG-9-7	9	68493004	1.06x10-9	0.37	1,2	--
	qGCG-9-8	9	74949380	1.12x10-9	0.39	1,2	CSS0021649;CSS0018716
	qGCG-9-9	9	103189075	9.81x10-11	0.35	1,3,4	--
	qGCG-9-10	9	104489740	3.17x10-9	0.23	3,4	--
	qGCG-9-11	9	104762631	3.82x10-9	0.19	3,4	--
	qGCG-9-12	9	111703920	1.12x10-9	0.37	3,4	CSS0029424
	qGCG-9-13	9	111765322	2.98x10-9	0.42	1,3,4	CSS0029424
	qGCG-9-14	9	111781377	8.83x10-10	0.39	3,4	CSS0029424
	qGCG-9-15	9	111922216	3.66x10-9	0.32	1,3,4	CSS0002290
	qGCG-9-16	9	113338375	4.02x10-11	0.52	1,2,3,4	CSS0022173;CSS0001285
	qGCG-9-17	9	113338443	8.93x10-10	0.3	1,2	CSS0022173;CSS0001285
	qGCG-9-18	9	113802228	2.38x10-9	0.33	1,2,3,4	CSS0048218
	qGCG-9-19	9	116277363	1.75x10-9	0.24	1,2	--
	qGCG-9-20	9	117055726	2.03x10-9	0.21	1,2	CSS0028423		Chr9__140146183	Chr9	140000000	1.75e-09	0.000106	0.003891	0.250128	CSS0006242;CSS0027172;CSS0017435;CSS0011651
	qGCG-9-21	9	119847335	5.08x10-12	0.58	1,2,3,4	CSS0039112;CSS0012590
	qGCG-9-22	9	138404308	3.63x10-10	0.44	1,2	CSS0023027;CSS0041636
	qGCG-9-23	9	140146183	1.75x10-9	0.25	1,2	CSS0006242;CSS0027172;CSS0017435;CSS0011651
	qGCG-9-24	9	145697441	1.83x10-11	0.42	1,2,3,4	CSS0009877;CSS0030898
	qGCG-9-25	9	146977954	2.60x10-9	0.24	1,2	CSS0004717
	qGCG-9-26	9	147000660	1.27x10-9	0.26	1,2,3,4	CSS0004717
	qGCG-9-27	9	147016243	9.14x10-10	0.27	1,2,3,4	CSS0004717
	qGCG-9-28	9	149111412	1.75x10-9	0.3	1,2	CSS0013019;CSS0003212
	qGCG-9-29	9	149141535	1.37x10-10	0.37	1,2,3,4	CSS0013019;CSS0003212;CSS0016177
	qGCG-9-30	9	149171569	5.93x10-11	0.42	1,2,3,4	CSS0016177
	qGCG-9-31	9	149175488	2.1610-11	0.26	1,2,3,4	CSS0016177
	qGCG-9-32	9	149175581	1.32x10-11	0.29	1,2,3,4	CSS0016177
	qGCG-9-33	9	150075517	3.20x10-9	0.33	1,2	CSS0031600;CSS0015473;CSS0035119
	qGCG-9-34	9	162118063	2.21x10-9	0.28	1,2	CSS0018680;CSS0027936;CSS0014140
	qGCG-9-35	9	163276063	1.93x10-9	0.26	1,2	CSS0033909;CSS0023338
	qGCG-9-36	9	163449280	2.86x10-9	0.31	1,2	CSS0037280;CSS0035387;CSS0005516
	qGCG-9-37	9	163990133	8.65x10-11	0.41	1,2,3,4	CSS0044188;CSS0017843;CSS0030975
	qGCG-9-38	9	163990582	3.79x10-11	0.38	1,2,3,4	CSS0044188;CSS0017843;CSS0030975
	qGCG-9-39	9	164590404	1.44x10-9	0.34	1,2,3,4	CSS0048595
	qGCG-9-40	9	164601232	1.96x10-9	0.31	1,2	CSS0048595
	qGCG-9-41	9	164616189	5.51x10-10	0.33	1,2,3,4	CSS0048595;CSS0026218
	qGCG-9-42	9	164637493	8.96x10-10	0.32	1,2,3,4	CSS0026218
	qGCG-9-43	9	164642839	5.27x10-10	0.3	1,2,3,4	CSS0026218
	qGCG-9-44	9	164656928	6.02x10-11	0.41	1,2,3,4	CSS0026218;CSS0024225
	qGCG-9-45	9	164833072	2.27x10-11	0.33	1,2,3,4	CSS0019089
	qGCG-9-46	9	164889684	6.93x10-10	0.31	1,2,3,4	CSS0011740;CSS0008953
	qGCG-9-47	9	164896956	3.57x10-10	0.38	1,2,3,4	CSS0011740;CSS0008953
	qGCG-9-48	9	164958724	2.79x10-9	0.31	1,2	CSS0008953
	qGCG-9-49	9	165228798	2.37x10-9	0.33	1,2	CSS0003301;CSS0027704;CSS0007787
