# Supplementary material for: Genome-Wide Association Studies of Biluochun Tea Plant Populations in Dongting Mountain and Comprehensive Identification of Candidate Genes Associated with Core Agronomic Traits by Four Analysis Models
Source: Plants (Basel). 2023 Oct 30;12(21):3719. doi: 10.3390/plants12213719 (PMC10650078; doi:10.3390/plants12213719)
Supplement: Supplementary file 1 [file plants-12-03719-s001.zip › Table S4.xlsx]

## Sheet: Sheet1
Table S4. Detailed primer sequence information of four canadidate genes and one reference gene.
Gene ID	Forward primer (5'-3')	Reserve primer (5'-3')
CSS0026218	CACTGAGTTCTCCGTTGG	GGAACCGCACTGTAATCG
CSS0027172	TTCTGAGTTGCTCCTTGA	ATGTGACCCTATCCCTTT
CSS0044862	CACAAGTGCTACCTCCCT	GAACCTTCCCACGACAAC
CSS0039426	TCCTCTGCTATGTCCTCCCC	TTCGATTGCGCTTTTCCA
CsACTIN	TTGGCATCGTTGAGGGTCT	CAGTGGGAACACGGAAAGC
