# Supplementary material for: Genome-Wide Association Studies of Biluochun Tea Plant Populations in Dongting Mountain and Comprehensive Identification of Candidate Genes Associated with Core Agronomic Traits by Four Analysis Models
Source: Plants (Basel). 2023 Oct 30;12(21):3719. doi: 10.3390/plants12213719 (PMC10650078; doi:10.3390/plants12213719)
Supplement: Supplementary file 1 [file plants-12-03719-s001.zip › Table S5.xlsx]

## Sheet: Sheet1
Table S5. Parameters of the calibration curves for the standard components.
Compound	Calibration curve equation	R²	Linearity range (mg/mL)
(+)-catechin (C)	Y = 0.0396x - 1.2974	0.9997	0.05-0.4
Gallic acid (GA)	Y = 0.174X - 0.756	0.9999	0.025-0.2
(−)-epicatechin (EC)	Y = 0.0487X - 1.2015	0.9998	0.05-0.4
(−)-gallocatechin (GC)	Y = 0.0129X - 0.4526	0.9999	0.05-0.4
(−)-epigallocatechin (EGC)	Y = 0.0137X - 0.2727_x000b_	0.9998	0.05-0.4
(−)-epicatechin gallate (ECG)	Y = 0.0938X - 14.782	0.993	0.05-0.4
(−)-catechin gallate (CG)	Y = 0.184X - 28.001	0.9987	0.05-0.4
(−)-epigallocatechin gallate (EGCG)	Y = 0.1029X - 15.271	0.9961	0.05-0.4
(−)-gallocat-echin gallate (GCG)	Y = 0.1558X - 23.658	0.9973	0.05-0.4
caffeine (CAF)	Y = 0.088X + 0.0226	0.9999	0.05-0.4
Soluble sugar	Y = 5.0742X + 0.0888	0.993	0-0.1
Tea polyphenols	Y = 6.3X + 0.0048	1	0.01-0.05
Free amino acids	Y = 1.24X - 0.0748_x000b_	0.9998	0-0.6
