# Supplementary material for: Genome-Wide Association Studies of Biluochun Tea Plant Populations in Dongting Mountain and Comprehensive Identification of Candidate Genes Associated with Core Agronomic Traits by Four Analysis Models
Source: Plants (Basel). 2023 Oct 30;12(21):3719. doi: 10.3390/plants12213719 (PMC10650078; doi:10.3390/plants12213719)
Supplement: Supplementary file 1 [file plants-12-03719-s001.zip › Tbale S6.xlsx]

## Sheet: Sheet1
Table S6. Detailed information about abbreviations used.
Number	Abbreviations	Full Description
1	SNPs	single nucleotide polymorphisms
2	nsSNPs	non-synonymous single nucleotide polymorphisms
3	GCG	(−)-gallocatechin gallate
4	GC	(−)-gallocatechin
5	CAF	caffeine
6	SS	soluble sugar
7	FAA	free amino acids
8	GWAS	Genome-wide association study
9	LD	linkage disequilibrium
10	MAC	minor allele count
11	GLM	general linear model
12	PCs	principal components
13	LM	linear model
14	C	(+)-catechin
15	GA	gallic acid
16	EC	(−)-epicatechin
17	EGC	(−)-epigallocatechin
18	ECG	(−)-epicatechin gallate
19	CG	(−)-catechin gallate
20	EGCG	(−)-epigallocatechin gallate
21	Chl	chlorophylls
22	CV	coefficient of variation
23	PCC	pearson correlation coefficient
24	MAF	Minor Allele Frequency
25	MAC	minor allele count
26	NJ	neighbor joining
27	PCA	Principal component analysis
28	dN/dS	the ratio of nsSNPs to synonymous SNPs
29	QTL	quantitative trait locus
30	HPLC	High Performance Liquid Chromatography
31	qRT-PCR	Real-Time Quantitative Reverse Transcription PCR
